# Supplementary material for: Highly efficient red thermally activated delayed fluorescence materials based on a cyano-containing planar acceptor
Source: Royal Society of Chemistry journal article supplement (doi:10.1039/c9tc05349b), 2019-01-01
Supplement: c9tc05349b1.pdf [file c9tc05349b1.pdf]

*Supporting information*

**Highly efficient red thermally activated delayed fluorescence material based on cyano-containing planar acceptor**

Yuan-Yuan Wang,<sup>†a</sup> Yuan-Lan Zhang,<sup>†a</sup> Kaining Tong,<sup>a</sup> Lei Ding,<sup>b</sup> Jian Fan,<sup>\*ac</sup> and Liang-Sheng Liao<sup>\*ac</sup>

*<sup>a</sup> Institute of Functional Nano & Soft Materials (FUNSOM), Jiangsu Key Laboratory for Carbon-Based Functional Materials & Devices, Soochow University, Suzhou, Jiangsu 215123, China*

*<sup>b</sup> College of Electrical and Information Engineering, Shaanxi University of Science and Technology, Xi'an, Shaanxi, 710021, China*

*<sup>c</sup> Institute of Organic Optoelectronics (IOO) of the Jiangsu Industrial Technology Research Institute (JITRI), Suzhou, Jiangsu 215212, China*

E-mail: lsiao@suda.edu.cn; jianfan@suda.edu.cn

<sup>†</sup>These two authors contribute equally to this work.

### **Device fabrication and measurements**

The OLED devices were fabricated through vacuum deposition on commercial pre-patterned ITO-coated glass substrates (ITO: 135 nm; Glass: 32 mm×32 mm×0.7 mm) with the sheet resistance of 15  $\Omega$  per square under high vacuum of  $4\times 10^{-6}$  Torr. The active area of each device is 3 mm  $\times$  3 mm. The ITO substrates were cleaned by sonication in acetone, ethanol, and deionized water for 15 min subsequently, and then dried in an oven at 110  $^{\circ}$ C and treated by UV ozone for 15 min. The deposition rates were controlled at 0.3-0.4  $\text{\AA}/\text{s}$  for HAT-CN, 0.2-0.4  $\text{\AA}/\text{s}$  for Liq, 1-2  $\text{\AA}/\text{s}$  for other organic layers and 6-8  $\text{\AA}/\text{s}$  for Al anode. The EL spectra, CIE coordinates,  $J$ - $V$ - $L$  curves, CE and PE of the devices were measured with a programmable spectra scan photometer (PHOTO RESEARCH, PR 655) and a constant current source meter (KEITHLEY 2400) at room temperature.

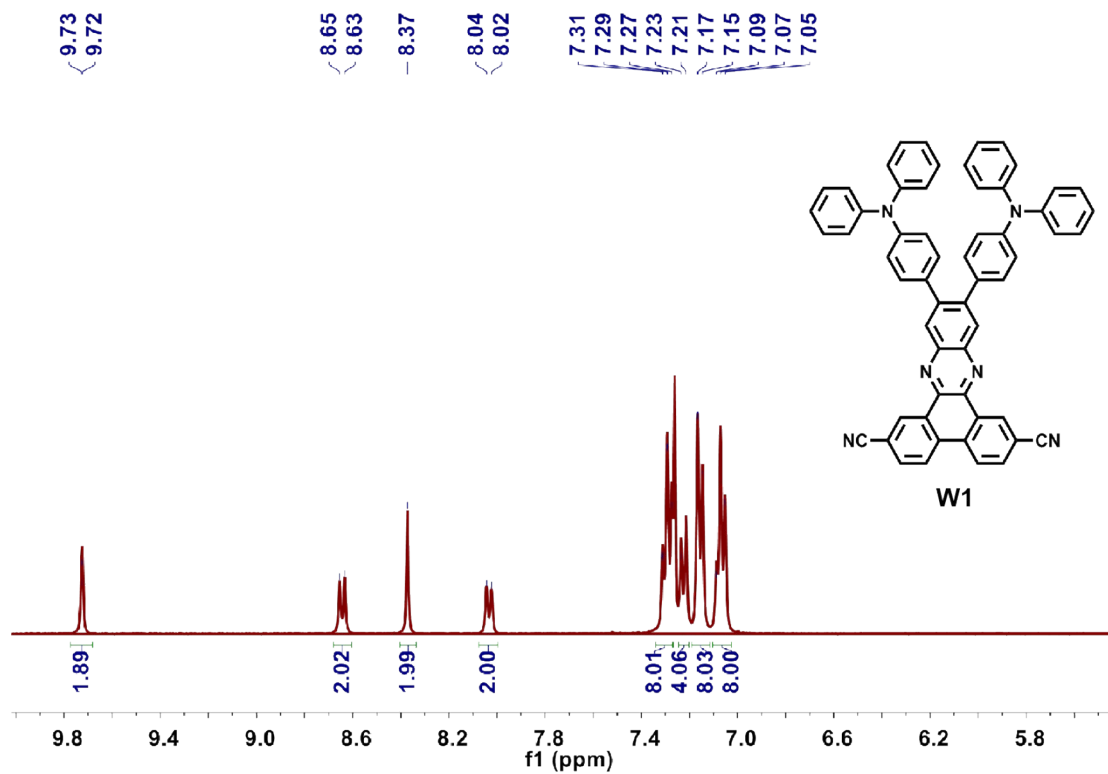

Figure S1. <sup>1</sup>H NMR spectrum of W1.

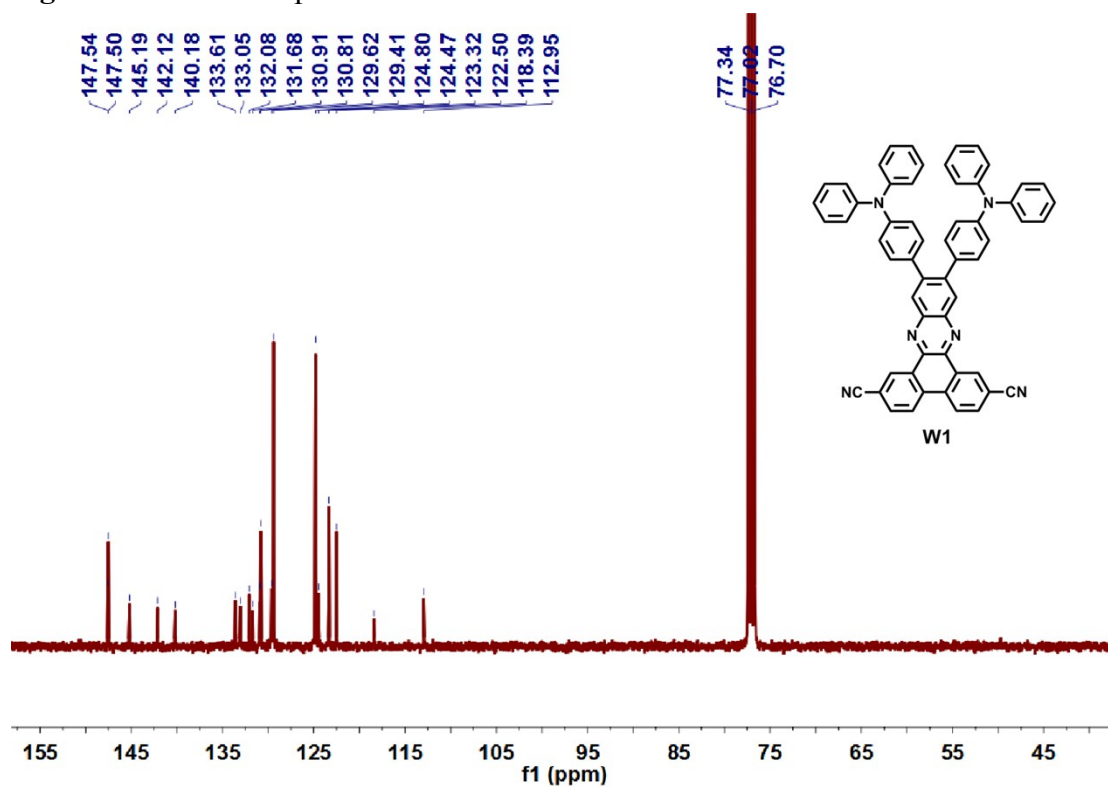

Figure S2. <sup>13</sup>C NMR spectrum of W1.

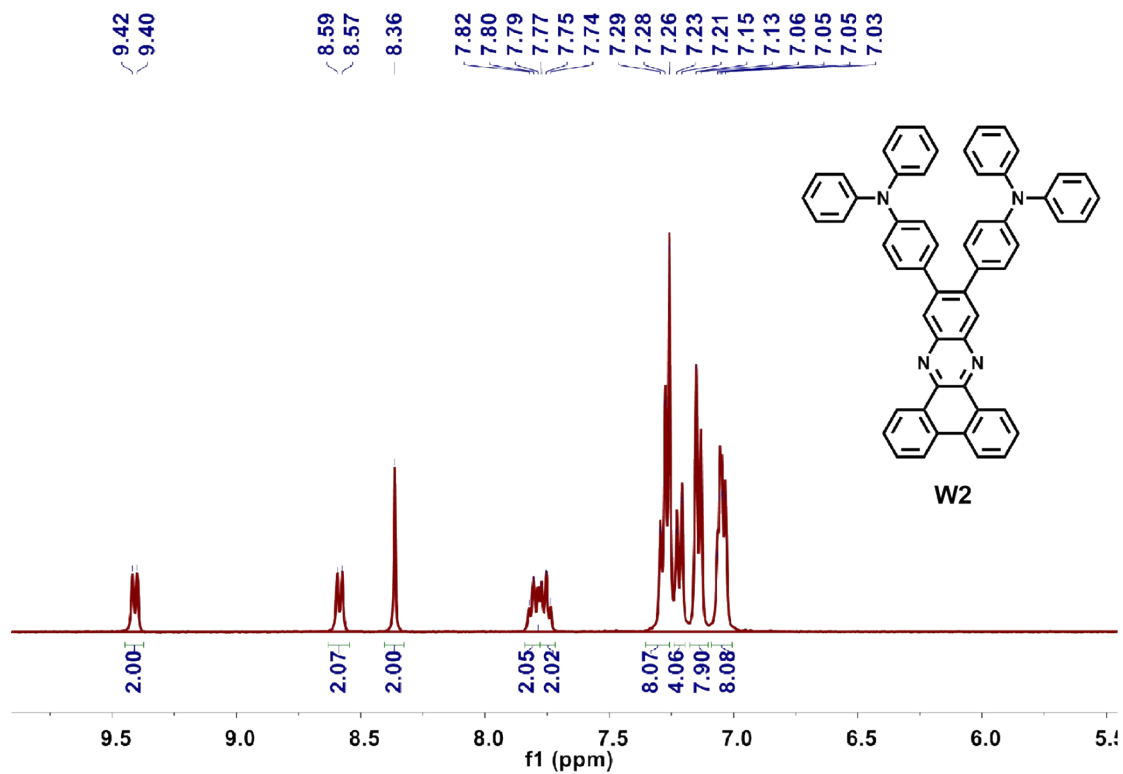

Figure S3.  $^1\text{H}$  NMR spectrum of W2.

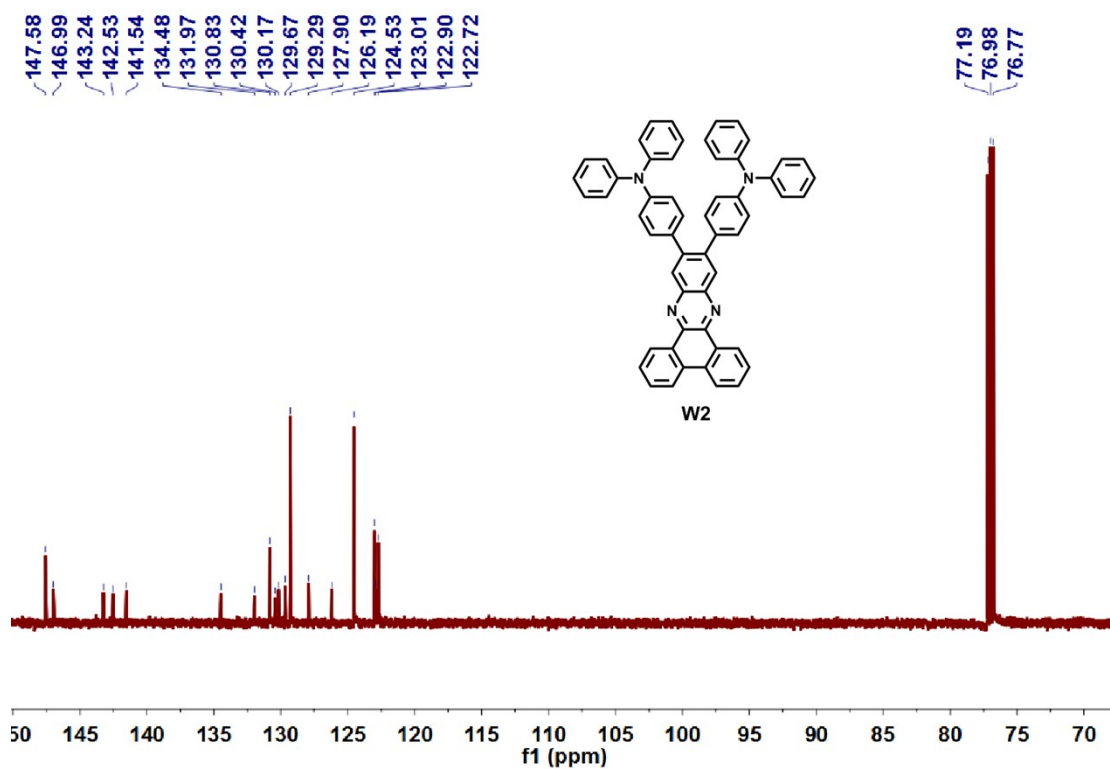

Figure S4.  $^{13}\text{C}$  NMR spectrum of W2.

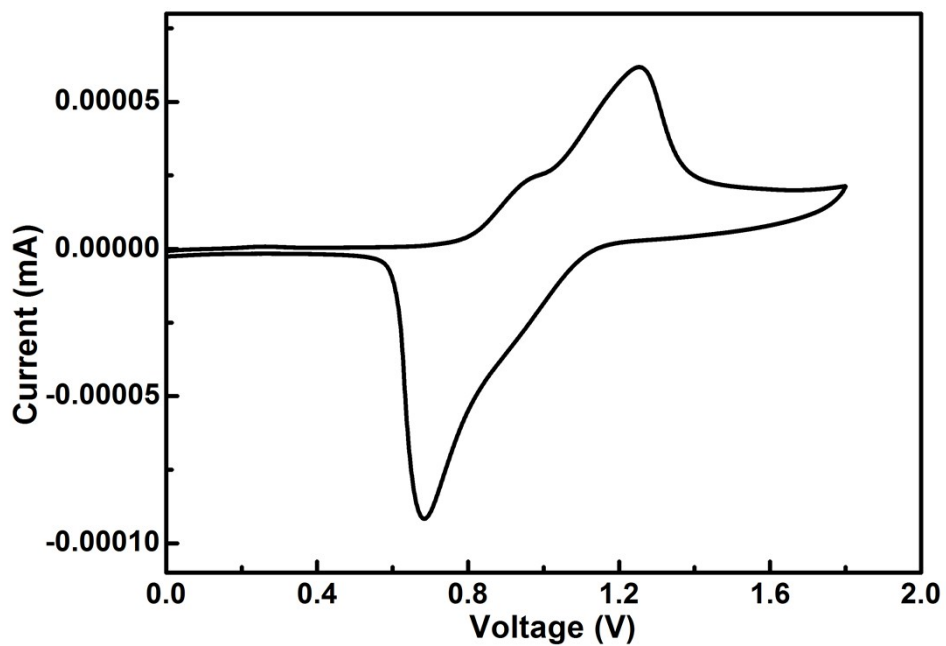

**Figure S5.** Cyclic voltammogram of W1 measured in THF for oxidation at room temperature.

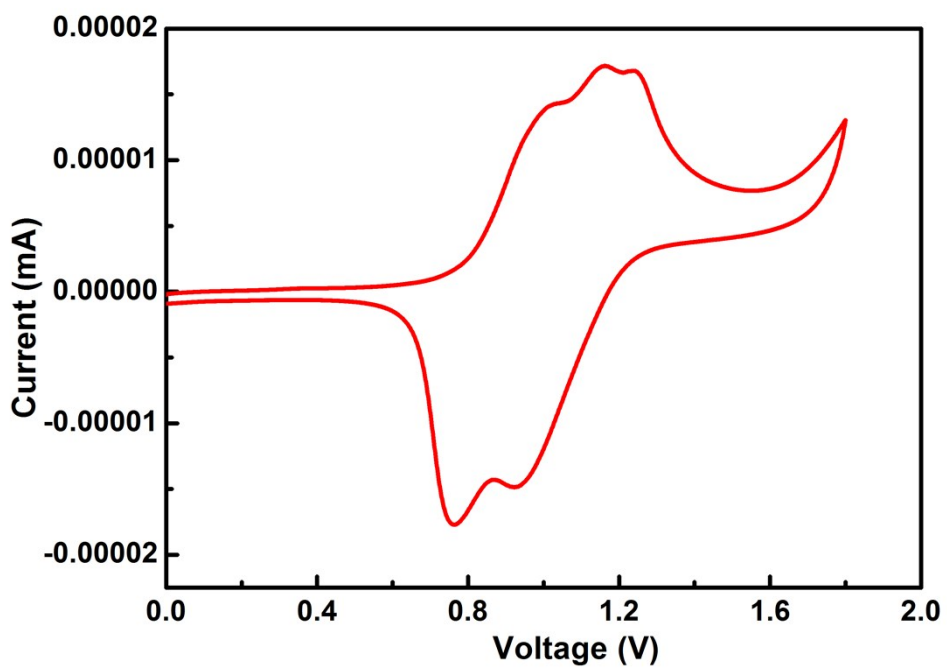

**Figure S6.** Cyclic voltammogram of W2 measured in THF for oxidation at room temperature.

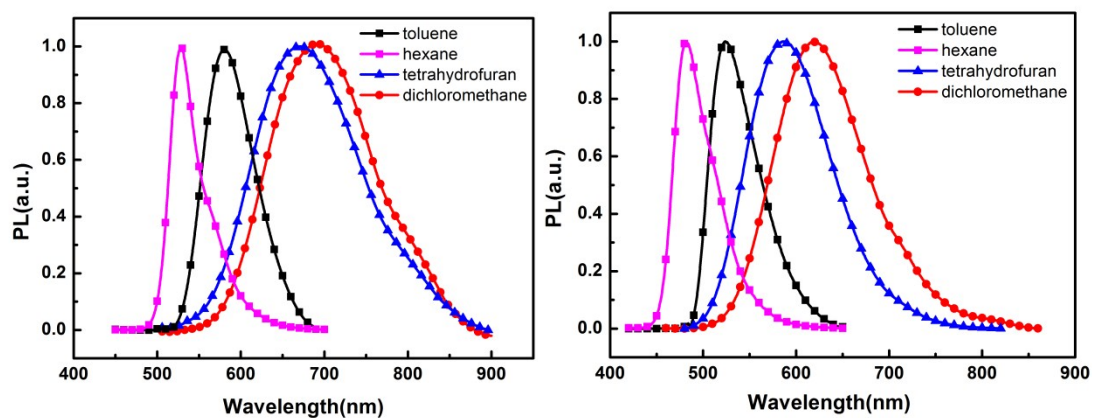

Figure S7. Normalized PL spectra of W1 (left) and W2 (right) in different solvents.

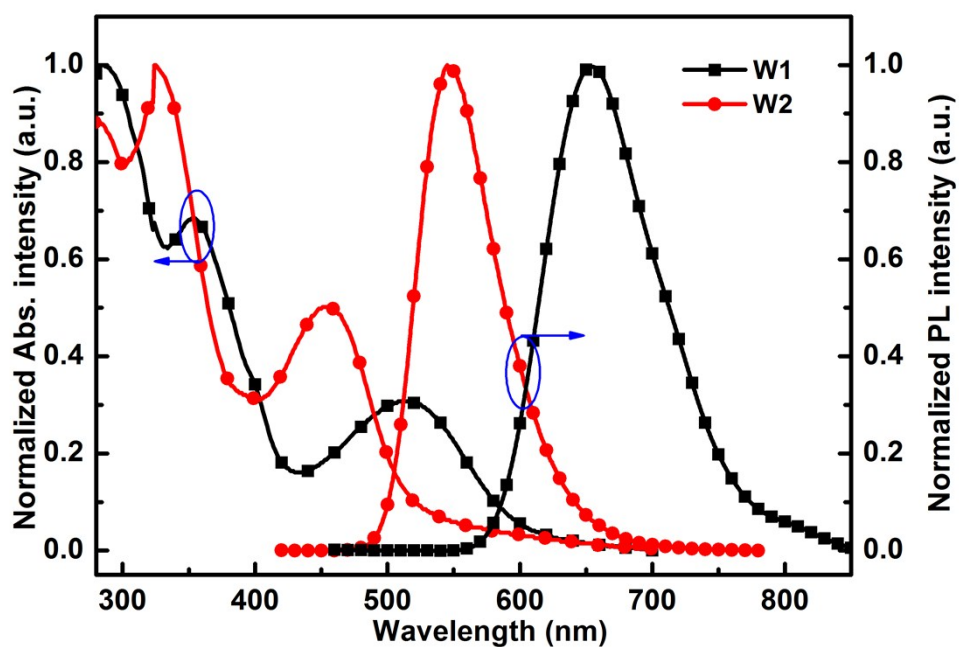

Figure S8. Normalized UV-vis absorption and PL spectra of W1&W2 neat film.

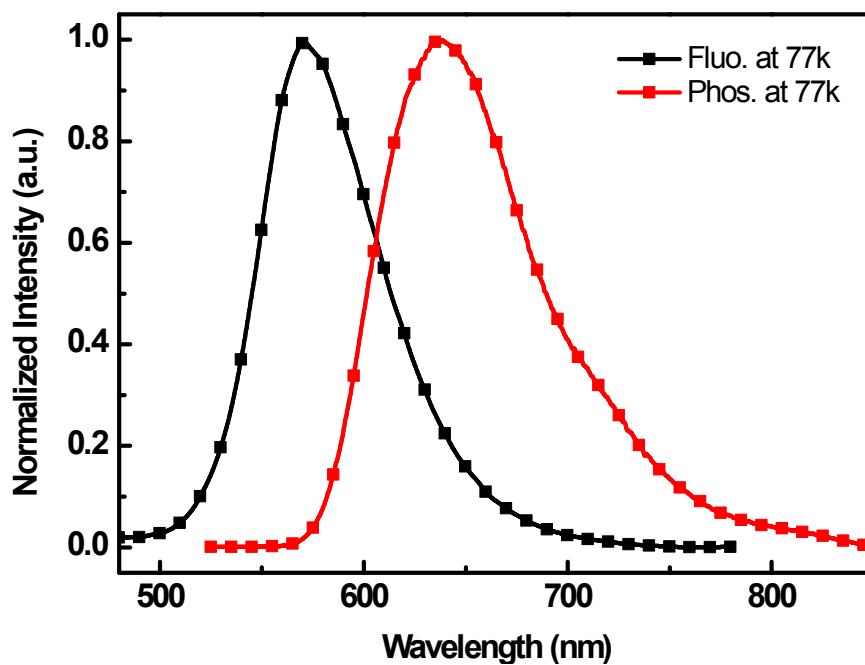

Figure S9. Fluorescence and phosphorescence spectra of W1 in toluene at 77 K.

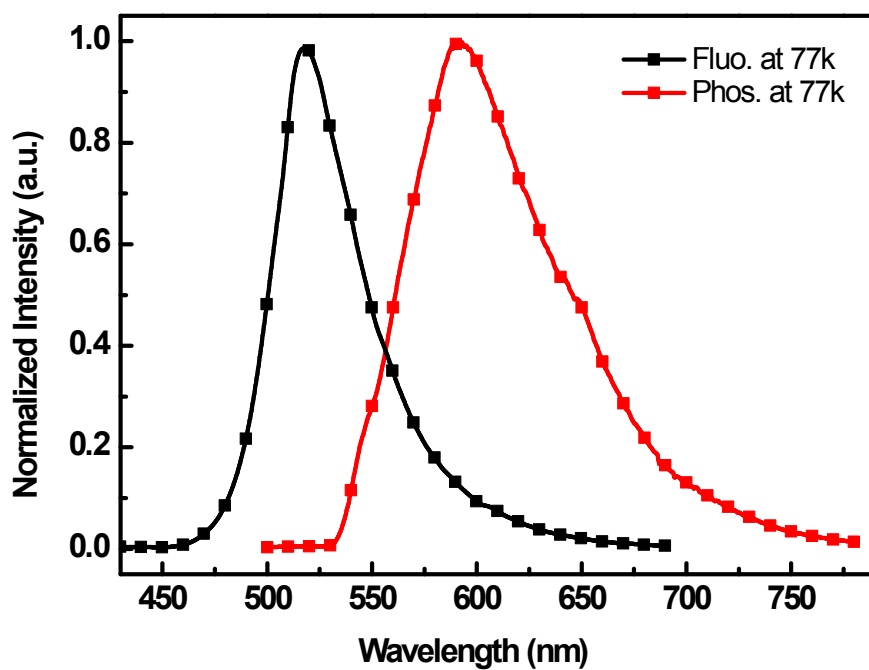

Figure S10. Fluorescence and phosphorescence spectra of W2 in toluene at 77 K.

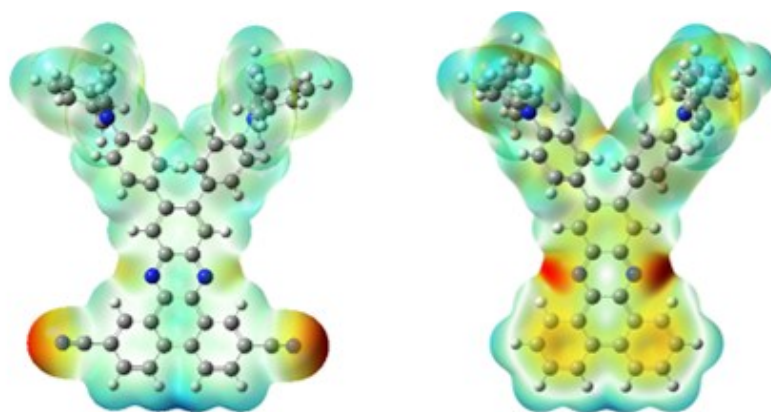

**Figure S11.** Isosurface of **W1** and **W2** mapped with electron static potential distribution calculation.



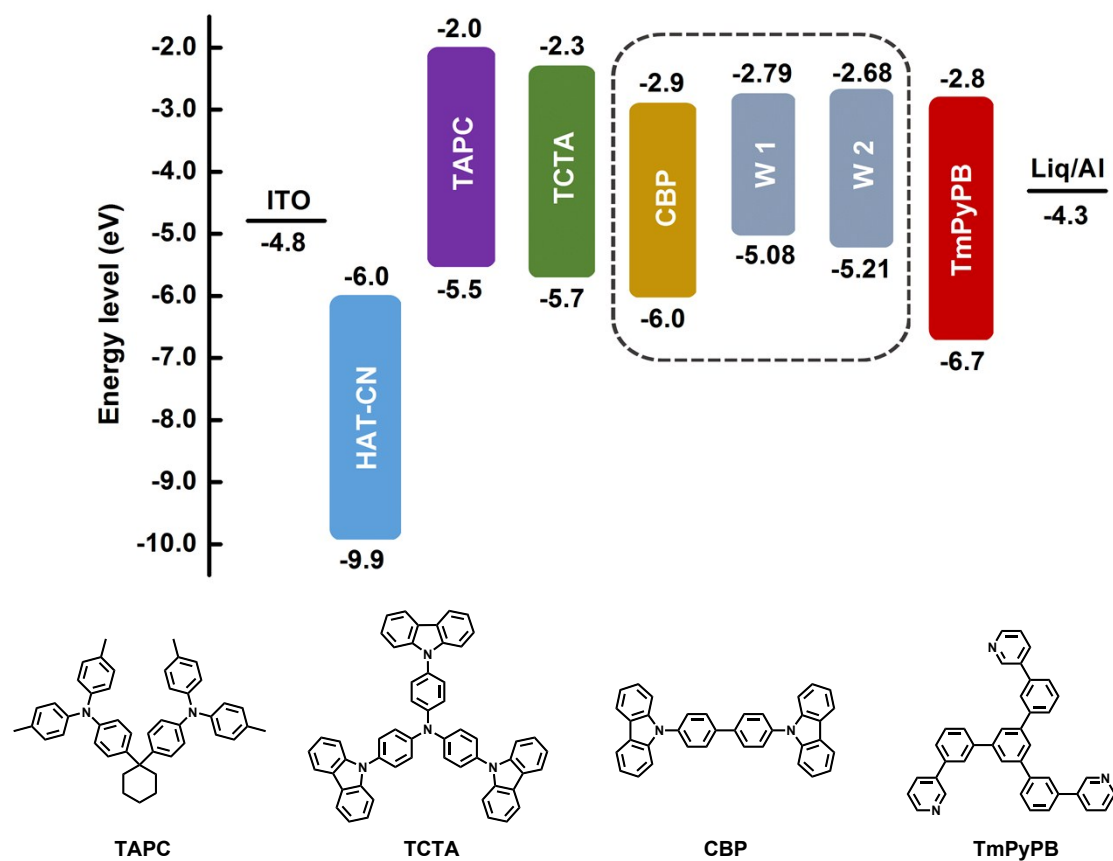

**Figure S12.** Energy level diagram and molecular structures of materials used in W1/W2 based device.

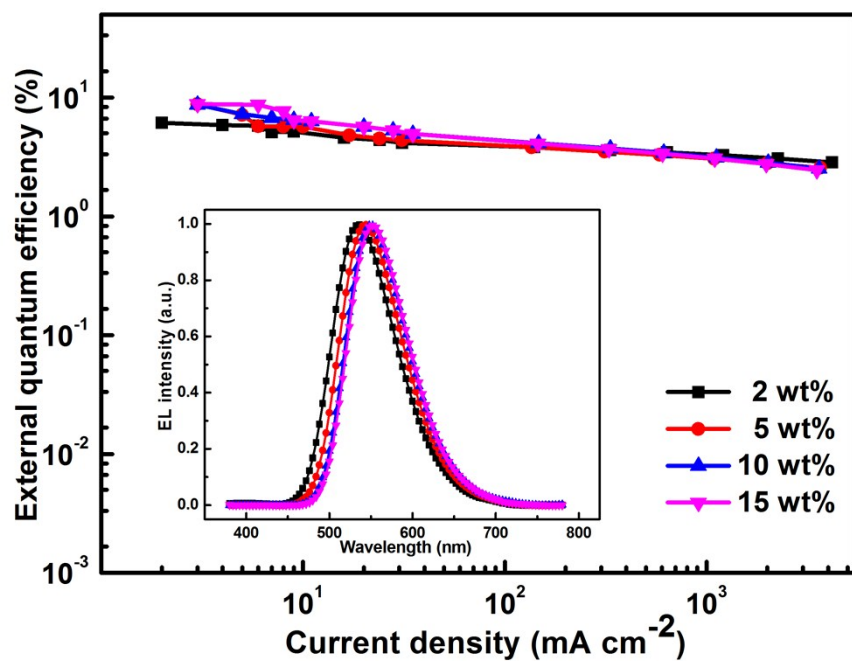

Figure S13. EQE-current density curve of W2 (inset: EL spectra at 5 mA cm<sup>-2</sup>).

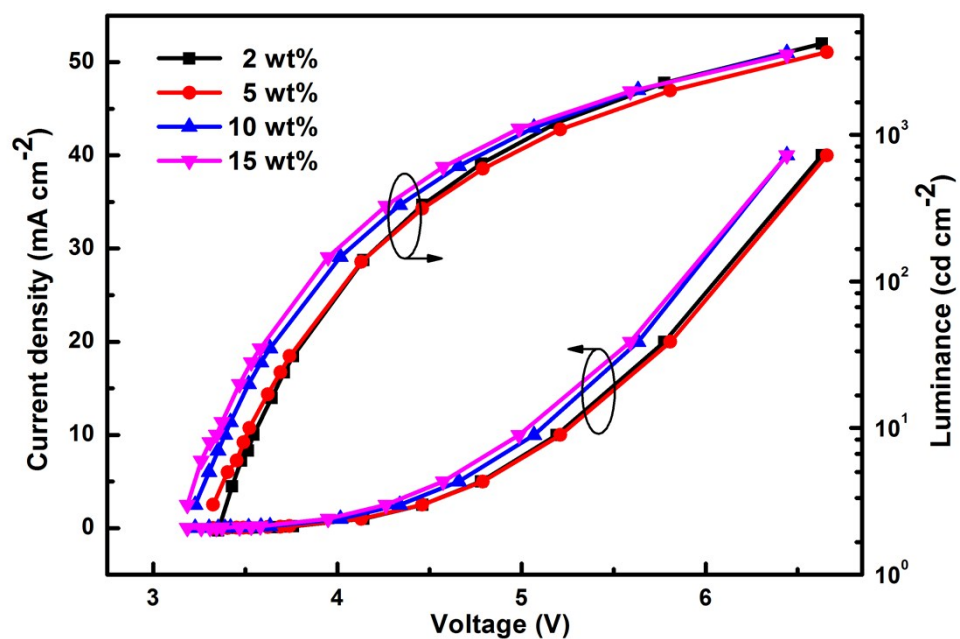

Figure S14. Current density -voltage-luminance ( $J$ - $V$ - $L$ ) characteristics of the doped OLEDs based on W2.

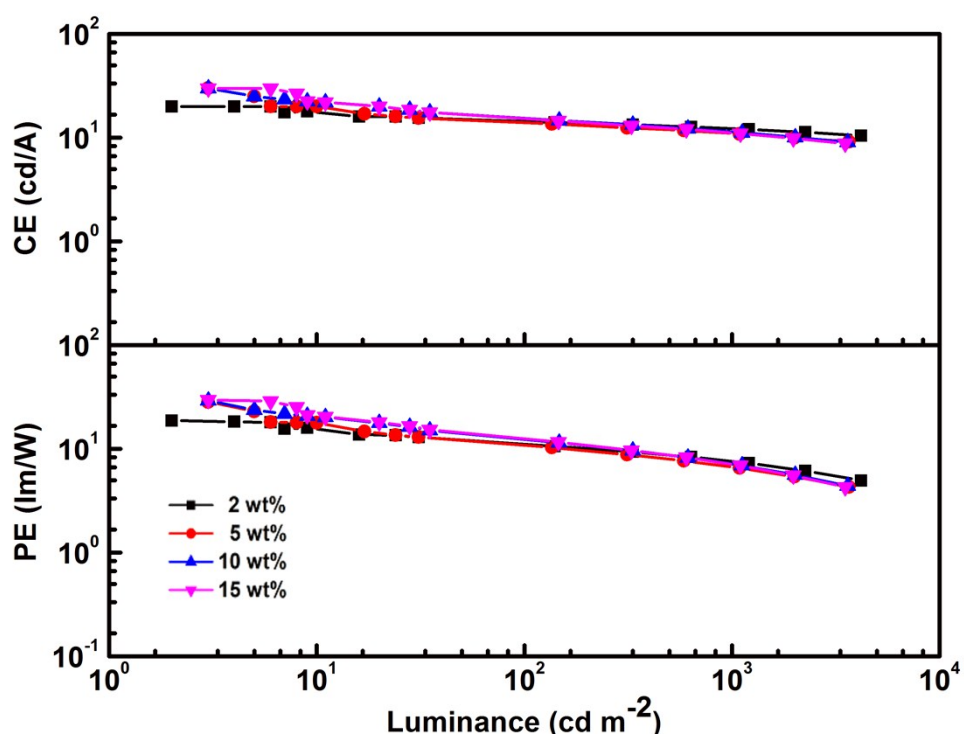

**Figure S15.** Power/Current Efficiency vs. Luminance relationships of W2-based device.

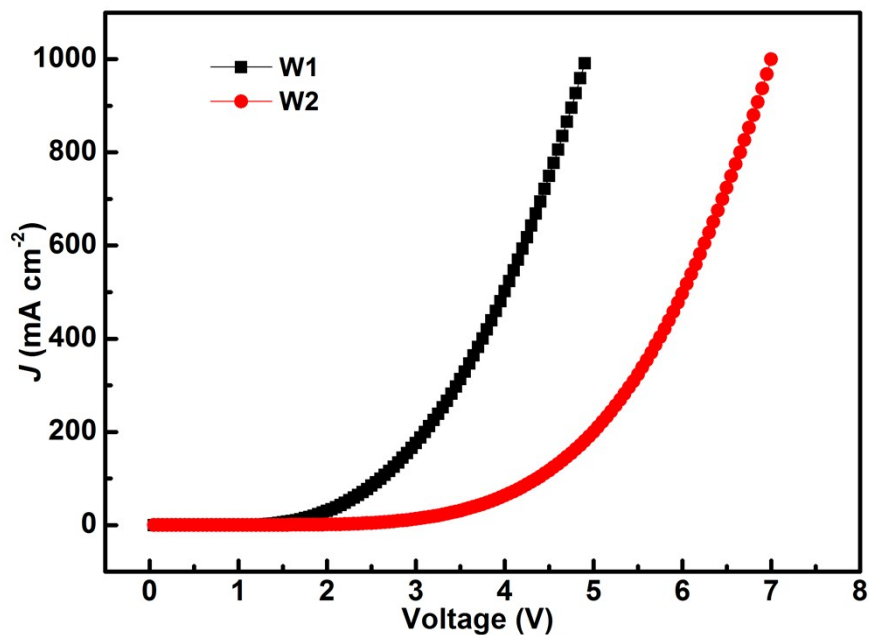

**Figure S16.** Current density ( $J$ )-voltage relationship of electron-only devices. Device structures: ITO/Liq (2 nm)/W1 or W2 (100 nm)/Liq (2 nm)/Al.

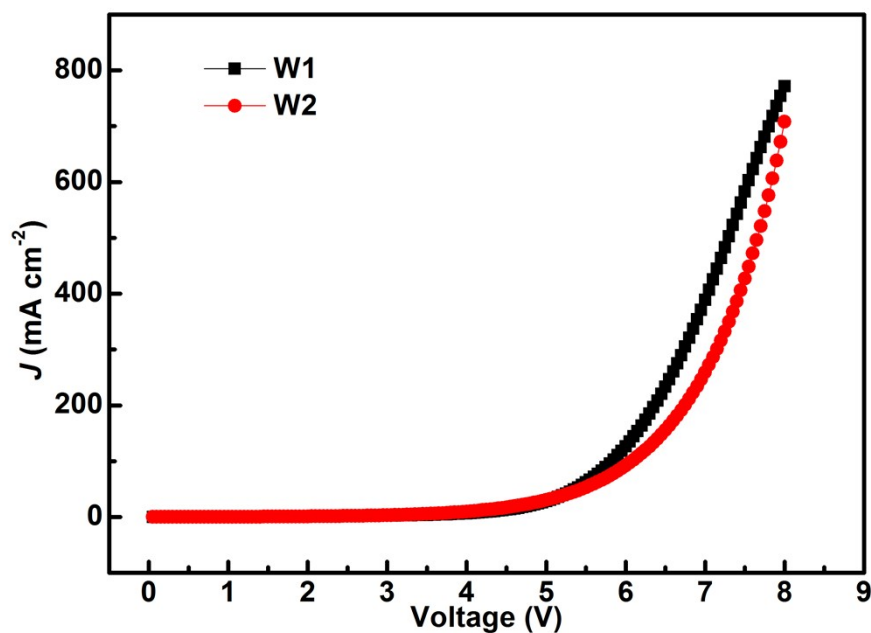

**Figure S17.** Current density ( $J$ )-voltage relationship of hole-only devices. Device structures: ITO/HAT-CN (10 nm)/W1 or W2 (100 nm)/HAT-CN (10 nm)/Al.

**Table S1.** Electroluminescence performance of **W2** doped device.

| Doping conc.<br>wt% | $V$ <sup>[a]</sup><br>(V) | CE <sup>[b]</sup><br>[cd/A] | PE <sup>[b]</sup><br>[lm/W] | EQE <sup>[b]</sup><br>[%] | CIE <sup>[c]</sup><br>(x,y) | $\lambda_{EL}$ <sup>[d]</sup><br>nm |
|---------------------|---------------------------|-----------------------------|-----------------------------|---------------------------|-----------------------------|-------------------------------------|
| <b>10%</b>          | 3.86                      | 30/16/11                    | 29.20/13.02/7.25            | 8.69/4.38/3.20            | 0.43, 0.55                  | 556                                 |
| <b>15%</b>          | 3.79                      | 30/16/11                    | 29.59/13.21/7.22            | 8.84/4.48/3.16            | 0.44, 0.54                  | 560                                 |

<sup>[a]</sup> Voltage at 100 cd m<sup>-2</sup>.

<sup>[b]</sup> Maximum/luminance at 100/luminance at 1000 cd m<sup>-2</sup>.

<sup>[c]</sup> Commission Internationale de L'Eclairage coordinates.

<sup>[d]</sup> Measured at 5 mA cm<sup>-2</sup>.
